# Supplementary material for: Dysregulation of PAK1 Is Associated with DNA Damage and Is of Prognostic Importance in Primary Esophageal Small Cell Carcinoma
Source: PubMed Central journal article supplement (PMC4490427; doi:10.3390/ijms160612035), 2015-05-27
Supplement: ijms-16-12035-s001.pdf [file ijms-16-12035-s001.pdf]

## Supplementary Information

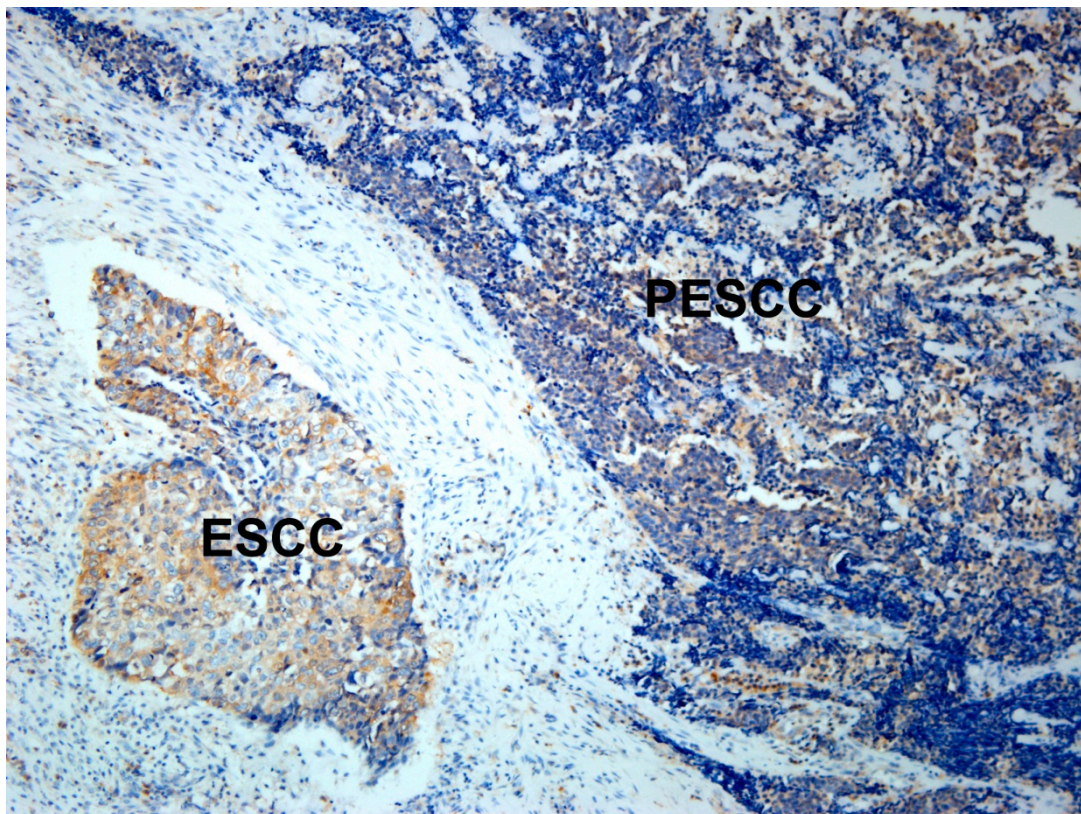

**Figure S1.** Representative image of immunohistochemical staining for PAK1 in the components of both PESCC and ESCC. Magnification ( $\times 100$ )
